# Supplementary material for: HBP1-mediated Regulation of p21 Protein through the Mdm2/p53 and TCF4/EZH2 Pathways and Its Impact on Cell Senescence and Tumorigenesis
Source: PubMed Central journal article supplement (PMC4933444; doi:10.1074/jbc.m116.714147), 2016-04-21
Supplement: 10.1074_M116.714147_jbc.M116.714147-2.pdf [file 10.1074_M116.714147_jbc.M116.714147-2.pdf]

**SUPPLEMENTARY TABLE 1.** The average expression intensities of HBP1, EZH2 and p21 in multiple cancers.

| Tissue                                | Sample size | HBP1             |                      |                         | EZH2  |            |            | p21   |            |             |
|---------------------------------------|-------------|------------------|----------------------|-------------------------|-------|------------|------------|-------|------------|-------------|
|                                       |             | ARS <sup>a</sup> | P-value <sup>b</sup> | Bonferroni <sup>c</sup> | ARS   | P-value    | Bonferroni | ARS   | P-value    | Bonferroni  |
| bladder cancer                        | 186         | 85.57            | 0.8944376            | 1                       | 74.83 | 4.33E-15   | 2.36E-10   | 87.76 | 5.10E-05   | 1           |
| bladder control                       | 64          | 76.14            |                      |                         | 52.55 |            |            | 75.95 |            |             |
| astrocytoma                           | 207         | 90.82            | 3.65E-22             | 1.99E-17                | 65.54 | 1.09E-30   | 5.97E-26   | 88.66 | 1.58E-21   | 8.64E-17    |
| ependymoma                            | 152         | 89.84            | 4.94E-12             | 2.70E-07                | 71.84 | 7.64E-37   | 4.17E-32   | 90.51 | 6.15E-27   | 3.36E-22    |
| glioblastoma                          | 498         | 90.54            | 7.49E-22             | 4.09E-17                | 82.77 | 4.46E-54   | 2.44E-49   | 87.69 | 4.70E-22   | 2.57E-17    |
| medulloblastoma                       | 302         | 92.06            | 1.49E-30             | 8.13E-26                | 92.29 | 2.77E-52   | 1.51E-47   | 72.77 | 0.00050112 | 1           |
| meningioma                            | 89          | 92.28            | 3.05E-24             | 1.67E-19                | 61.09 | 1.48E-19   | 8.10E-15   | 91.98 | 3.79E-23   | 2.07E-18    |
| neuroblastoma                         | 221         | 91.50            | 2.40E-24             | 1.31E-19                | 85.85 | 1.08E-45   | 5.87E-41   | 83.18 | 5.18E-07   | 0.028243796 |
| oligodendroglioma                     | 117         | 88.67            | 7.29E-06             | 0.397805619             | 75.32 | 6.26E-28   | 3.42E-23   | 84.37 | 1.40E-08   | 0.000765794 |
| retinoblastoma                        | 78          | 82.14            | 0.0154583            | 1                       | 97.47 | 5.17E-31   | 2.82E-26   | 89.74 | 1.09E-20   | 5.96E-16    |
| brain control                         | 104         | 85.88            |                      |                         | 35.90 |            |            | 75.75 |            |             |
| breast cancer                         | 3080        | 93.65            | 9.17E-25             | 5.01E-20                | 78.43 | 7.47E-130  | 4.08E-125  | 87.27 | 0.32876776 | 1           |
| breast control                        | 374         | 94.56            |                      |                         | 56.31 |            |            | 87.55 |            |             |
| colorectal adenocarcinoma             | 1841        | 91.46            | 7.52E-34             | 4.10E-29                | 84.65 | 3.45E-86   | 1.88E-81   | 91.12 | 3.44E-59   | 1.87E-54    |
| colon mucosa normal                   | 273         | 93.30            |                      |                         | 75.62 |            |            | 95.38 |            |             |
| gastric cancer                        | 681         | 92.33            | 0.0526557            | 1                       | 79.15 | 6.23E-12   | 3.39E-07   | 90.87 | 0.00579905 | 1           |
| gaster control                        | 61          | 92.02            |                      |                         | 69.18 |            |            | 91.33 |            |             |
| head and neck squamous cell carcinoma | 220         | 91.64            | 3.86E-05             | 1                       | 88.79 | 9.22E-09   | 0.0005035  | 92.55 | 0.80009657 | 1           |
| head and neck squamous cell control   | 59          | 93.53            |                      |                         | 82.51 |            |            | 92.78 |            |             |
| ccRCC                                 | 652         | 94.17            | 3.13E-06             | 0.170801273             | 66.93 | 7.09E-85   | 3.87E-80   | 93.13 | 1.30E-46   | 7.12E-42    |
| kidney control                        | 244         | 93.77            |                      |                         | 40.37 |            |            | 85.53 |            |             |
| hepatocellular carcinoma              | 263         | 92.45            | 0.0001599            | 1                       | 77.44 | 2.66E-29   | 1.45E-24   | 87.27 | 0.53621843 | 1           |
| liver control                         | 62          | 94.50            |                      |                         | 51.18 |            |            | 87.85 |            |             |
| lung adenocarcinoma                   | 1158        | 91.62            | 8.55E-39             | 4.67E-34                | 75.85 | 7.98E-111  | 4.36E-106  | 89.47 | 4.81E-53   | 2.62E-48    |
| lung squamous cell carcinoma          | 422         | 90.09            | 8.59E-41             | 4.69E-36                | 82.05 | 6.44E-97   | 3.52E-92   | 91.16 | 1.19E-21   | 6.48E-17    |
| lung control                          | 333         | 94.37            |                      |                         | 58.63 |            |            | 94.31 |            |             |
| oral squamous cell carcinoma          | 339         | 93.57            | 2.21E-09             | 0.00012053              | 81.35 | 0.39199038 | 1          | 94.84 | 0.00059649 | 1           |
| oral squamous cell control            | 118         | 94.14            |                      |                         | 81.50 |            |            | 92.90 |            |             |
| ovarian cancer                        | 379         | 90.89            | 0.0016606            | 1                       | 80.54 | 3.40E-22   | 1.86E-17   | 84.98 | 0.00190026 | 1           |
| ovary control                         | 120         | 92.76            |                      |                         | 69.79 |            |            | 88.83 |            |             |
| pancreatic cancer                     | 263         | 89.47            | 3.73E-11             | 2.04E-06                | 74.64 | 4.73E-21   | 2.58E-16   | 92.59 | 0.66870137 | 1           |

|                  |     |       |          |             |       |            |   |       |          |             |
|------------------|-----|-------|----------|-------------|-------|------------|---|-------|----------|-------------|
| pancreas control | 83  | 94.14 |          |             | 59.69 |            |   | 91.96 |          |             |
| prostate cancer  | 345 | 94.30 | 9.93E-08 | 0.005422575 | 64.75 | 9.51E-05   | 1 | 88.81 | 1.20E-05 | 0.655455373 |
| prostate control | 81  | 90.98 |          |             | 53.47 |            |   | 91.60 |          |             |
| skin melanoma    | 522 | 93.25 | 1.73E-36 | 9.44E-32    | 81.20 | 0.00014746 | 1 | 88.98 | 1.40E-12 | 7.63E-08    |
| skin normal      | 305 | 95.44 |          |             | 79.69 |            |   | 93.25 |          |             |

a: ARS denotes the average rank score.

b: The *P*-values were calculated using the Wilcoxon rank-sum test in R (<http://www.r-project.org/>) software environment as compared to the corresponding normal or non-tumour tissues.

c: The *P*-values were adjusted using the Bonferroni correction method by the function “p.adjust” in R software. Bonferroni corrected *p* values  $\leq 0.05$  were considered as statistically significant differences.
